# Supplementary material for: Dinuclear lanthanide complexes bridged by nitronyl nitroxide radical ligands with 2-phenolate groups: structure and magnetic properties
Source: Royal Society of Chemistry journal article supplement (doi:10.1039/c3nj00739a), 2013-01-01
Supplement: c3nj00739a.pdf [file c3nj00739a.pdf]

## Supporting Information

### **Dinuclear lanthanide complexes bridged by nitronyl nitroxide radical ligands with 2-phenolate groups: structure and magnetic Properties**

Xuelan Mei, Xiufeng Wang, Juanjuan Wang, Yue Ma, Licun Li\*, Daizheng Liao

*Department of Chemistry, Key Laboratory of Advanced Energy Materials Chemistry  
and Tianjin Key Laboratory of Metal and Molecule-based Material Chemistry,  
Nankai University, Tianjin 300071, China*

*E-mail: llicun@nankai.edu.cn*

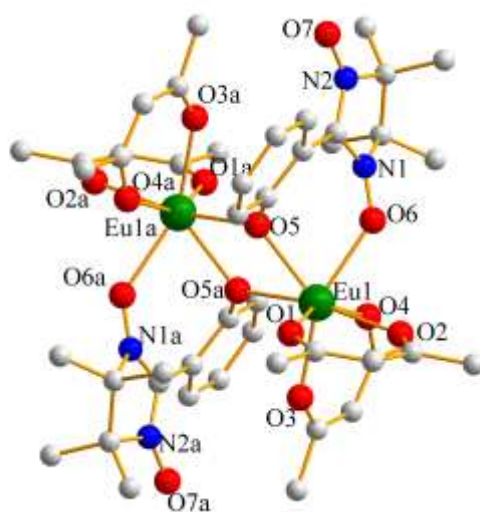

**Fig. S1.** Crystal structure of complex **2**. All hydrogen atoms are omitted for clarity.  
 Symmetry code a:  $-x+2, -y+1, -z+1$ .

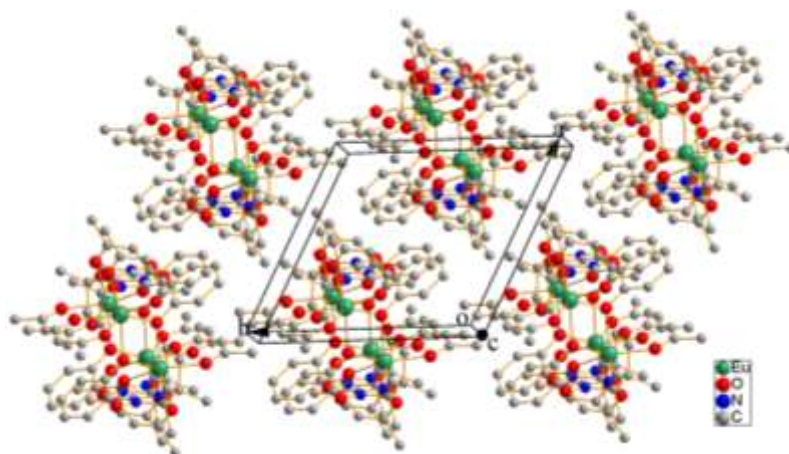

**Fig. S2.** Packing diagram of complex **2**. All hydrogen atoms are omitted for clarity.

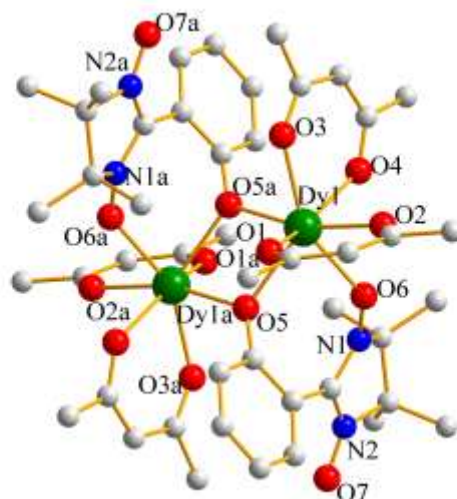

**Fig. S3.** Crystal structure of complex **3**. All hydrogen atoms are omitted for clarity.  
 Symmetry code a:  $-x+1, -y, -z$ .

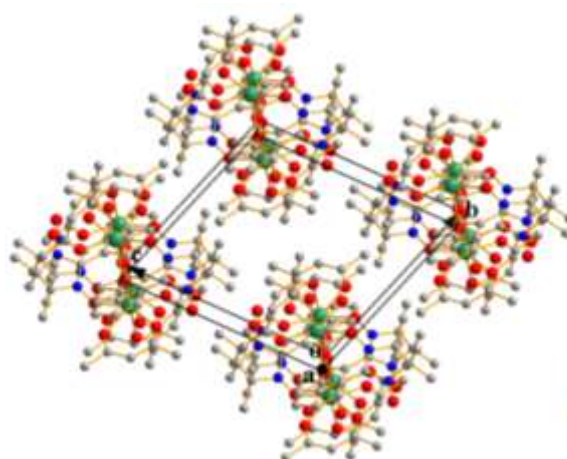

**Fig. S4.** Packing diagram of complex **3**. All hydrogen atoms are omitted for clarity.

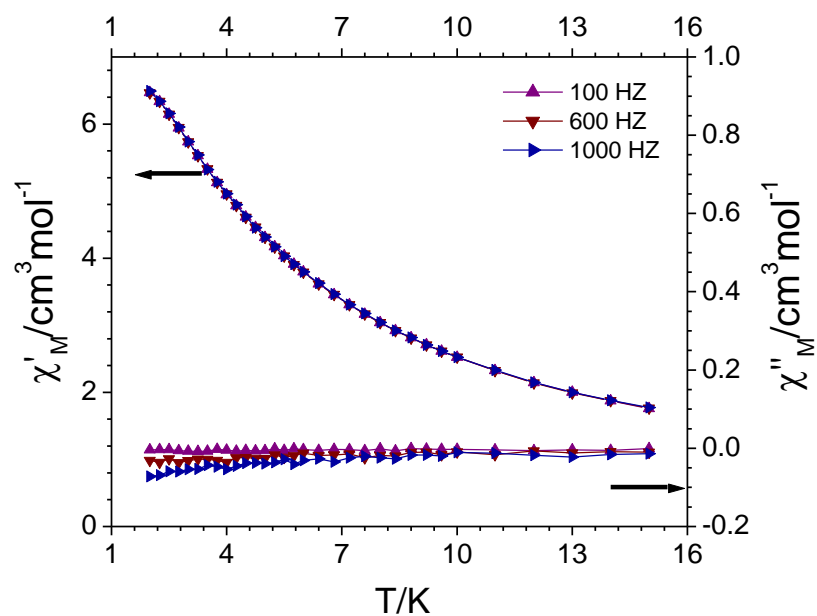

**Fig. S5.** Temperature dependence of the in-phase and out-of-phase components of the ac magnetic susceptibility for **3** in zero dc fields with an oscillation of 3.5 Oe.
